# Supplementary material for: Phosphatidylcholine formation by LPCAT1 is regulated by Ca2+ and the redox status of the cell
Source: PubMed Central journal article supplement (PMC3439698; doi:10.1186/1471-2091-13-8), 2012-06-07
Supplement: 1471-2091-13-8-S2.pdf [file 1471-2091-13-8-S2.pdf]

**Supplemental Table 1. Cysteines substitution mutants**

| Clone | lane in Figure 6A | Protein                                                 | Activity <sup>1</sup> | Cysteines Position <sup>2</sup> |     |     |     |     |     |     |     |     |     |     |     |   |
|-------|-------------------|---------------------------------------------------------|-----------------------|---------------------------------|-----|-----|-----|-----|-----|-----|-----|-----|-----|-----|-----|---|
|       |                   |                                                         |                       | 211                             | 216 | 263 | 278 | 314 | 330 | 401 | 443 | 488 | 501 | 514 | 530 |   |
|       | 2                 | LPCAT1                                                  | +                     |                                 |     |     |     |     |     |     |     |     |     |     |     |   |
| FK469 | 3                 | C <sup>211</sup> T                                      | +                     | T                               |     |     |     |     |     |     |     |     |     |     |     |   |
| FK621 | Fig. S1           | C <sup>211</sup> T C <sup>501</sup> A                   | +                     | T                               |     |     |     |     |     |     |     |     |     | A   |     |   |
| FK482 | 4                 | C <sup>211</sup> T C <sup>443</sup> A                   | +                     | T                               |     |     |     |     |     |     |     | A   |     |     |     |   |
| FK480 | 5                 |                                                         | +                     | T                               |     |     |     | A   |     |     |     | A   |     |     |     |   |
| FK481 | 6                 |                                                         | +                     | T                               | A   |     |     |     |     |     |     | A   |     |     | A   |   |
| FK493 | 7                 | C <sup>211</sup> T C <sup>(216,314,443,501,514)</sup> A | +                     | T                               | A   |     |     | A   |     |     |     | A   |     | A   | A   |   |
| FK492 | 8                 |                                                         | -                     | T                               | A   | A   |     |     |     |     |     | A   |     | A   | A   |   |
| FK495 | 9                 |                                                         | -                     | T                               | A   | A   |     |     |     |     |     | A   |     |     | A   |   |
| FK494 | 10                |                                                         | -                     | T                               | A   | A   |     | A   |     |     |     | A   |     | A   | A   |   |
| FK605 | 11                |                                                         | -                     | T                               | A   | A   |     | A   |     | A   |     | A   |     | A   | A   |   |
| FK607 | 12                |                                                         | -                     | T                               | A   | A   |     | A   | A   |     |     | A   |     | A   | A   |   |
| FK606 | 13                |                                                         | -                     | T                               | A   | A   |     | A   | A   | A   |     | A   |     | A   | A   |   |
| FK609 | 14                |                                                         | -                     | T                               | A   | A   |     | A   | A   | A   |     | A   |     | A   | A   | A |
| FK613 | 15                |                                                         | -                     | T                               | A   | A   | A   | A   | A   | A   |     | A   |     |     | A   | A |
| FK622 | Fig. S1           |                                                         | -                     | T                               | A   | A   | A   | A   | A   | A   |     |     |     | A   | A   | A |
| FK614 | 16                | Cys <sup>12-</sup>                                      | -                     | T                               | A   | A   | A   | A   | A   | A   |     | A   |     | A   | A   | A |
| FK623 | Fig. S1           |                                                         | -                     |                                 | A   | A   | A   | A   | A   | A   |     | A   |     | A   | A   | A |

<sup>1</sup> Activity rates of the enzymes are shown in Figure 4, Figure 6 and Supp. Figure S1.

<sup>2</sup> Position of the 12 cysteines residues and substitution to a threonine (T) or an alanine (A) are indicated in the corresponding column.
