# Supplementary material for: Phosphatidylcholine formation by LPCAT1 is regulated by Ca2+ and the redox status of the cell
Source: PubMed Central journal article supplement (PMC3439698; doi:10.1186/1471-2091-13-8), 2012-06-07
Supplement: 1471-2091-13-8-S3.pdf [file 1471-2091-13-8-S3.pdf]

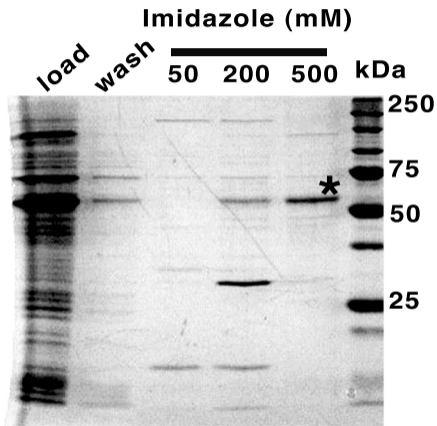

LPCAT1

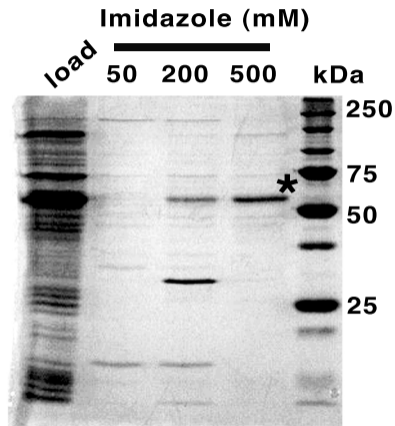

C211T

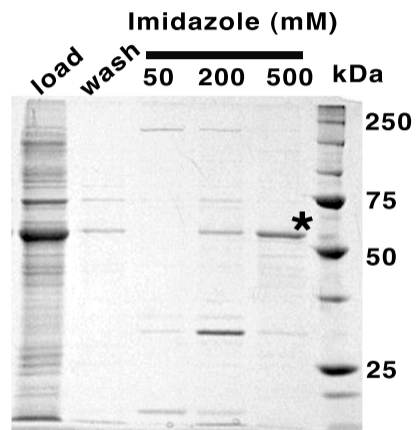

Cys12-
